# Supplementary material for: Large-scale shift in the structure of a kelp forest ecosystem co-occurs with an epizootic and marine heatwave
Source: PubMed Central journal article supplement (PMC7935997; doi:10.1038/s42003-021-01827-6), 2021-03-05
Supplement: 42003_2021_1827_MOESM2_ESM.pdf [file 42003_2021_1827_MOESM2_ESM.pdf]

1 **Supplementary Material**

2

3

4 Supplementary Table 1 – Component-wise PLSR results for each date range (Figure 3).

5

|                   | Full Timeseries | Preceding MHW | Recent Decade | With Biological Forcings |
|-------------------|-----------------|---------------|---------------|--------------------------|
| Date Range        | 1985 – 2016     | 1985 – 2013   | 2003 – 2016   | 2003 - 2016              |
| Component 1 $r^2$ | 0.303           | 0.224         | 0.517         | 0.498                    |

6

7

8  
9  
10  
11  
12  
13  
14  
15  
16  
17

Supplementary Figure 1 – PLSR models and forecasts using physical drivers (a) and physical and biological drivers (b) overlaid on satellite derived kelp canopy. Forecasted scenarios use environmental variables (MEI, NPGO, PDO, Mean Hs, seasonal SST (spring and summer), MHW days, and seasonal NO<sub>3</sub> (spring and summer) conditions at the climatological mean for 2017 to 2019. For all other years (1985 - 2016 and 2003 - 2016), these variables are the environmentally derived indices.

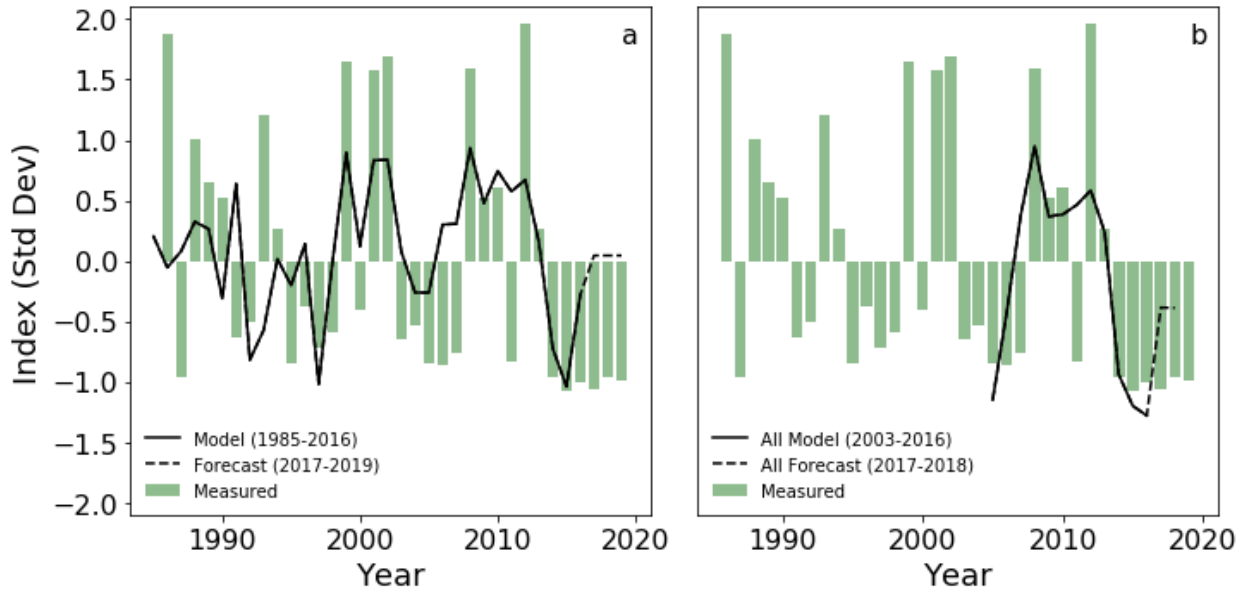

18  
19  
20  
21  
22

23 Supplementary Figure 2 – Least squares regression (LSR) fits for standardized indices of  
 24 environmental ((a) bull kelp, (b) spring nitrate, and (d) MHW days) and biological ((c) sunflower  
 25 star and (e) purple urchin) preceding the NE Pacific MHW and following the NE Pacific MHW.  
 26 Date ranges depended on data availability for each variable. An ordinary LSR (OLSR) was  
 27 applied to all variables except the sunflower star's preceding NE Pacific MHW date range (panel  
 28 c; 2003 – 2013) where a second degree polynomial LSR was applied. For variable-wise  
 29 regression statistics see S4. Shading around the regression lines represents the 95% confidence  
 30 intervals.  
 31

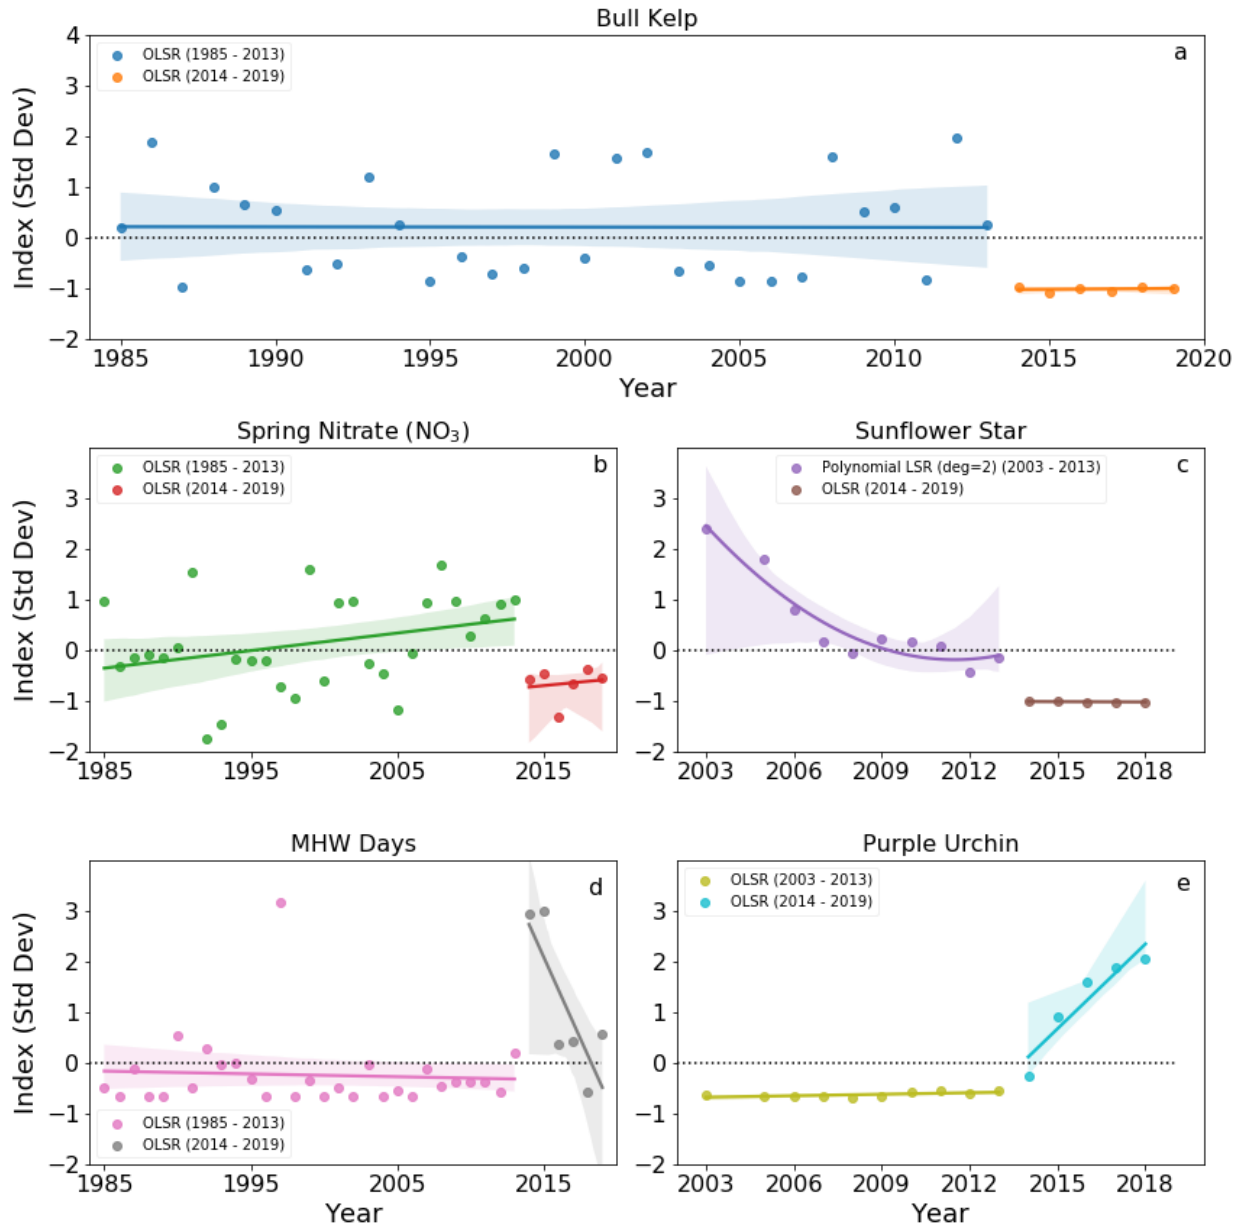

32  
 33

34 Supplementary Table 2 - Least squares regression (LSR) fits for standardized indices of  
 35 environmental (bull kelp, spring nitrate, MHW days) and biological (purple urchin and sunflower  
 36 star) show in Fig. 4 and S3. Date ranges presented for each timeframe (preceding MHW,  
 37 following MHW, full timeseries) depended on data availability for each variable. Preceding the  
 38 NE Pacific MHW, the date ranges of 1985 to 2013 and 2003 to 2013 were used for  
 39 environmental and biological variables, respectively. Following the NE Pacific MHW, date  
 40 ranges were from 2014 to 2019 and 2014 to 2018 were used for environmental and biological  
 41 variables, respectively. Full timeseries date ranges were 1985 to 2019 for environmental  
 42 variables, and 2003 to 2018 for biological variables. Bolded and grey highlighted cells designate  
 43 statistically significant relationships ( $p < 0.05$ ). Ordinary LSR was used for all trends presented  
 44 below with the exception of the preceding MHW sunflower star trend, where a second order  
 45 polynomial LSR was applied (indicated with \*).

46

| Index          | Preceding MHW<br>(1985 – 2013 or 2003 – 2013) |                      |                                         | Following MHW<br>(2014 – 2019 or 2014 -2018) |                      |                                         | Full Timeseries<br>(1985 – 2019 or 2003 to 2018) |                      |                                        |
|----------------|-----------------------------------------------|----------------------|-----------------------------------------|----------------------------------------------|----------------------|-----------------------------------------|--------------------------------------------------|----------------------|----------------------------------------|
|                | slope                                         | $r^2$                | $p$ -value                              | slope                                        | $r^2$                | $p$ -value                              | slope                                            | $r^2$                | $p$ -value                             |
| Bull kelp      | $-4.6 \times 10^{-4}$                         | $1.6 \times 10^{-5}$ | 0.98                                    | $3.7 \times 10^{-3}$                         | $2.1 \times 10^{-2}$ | 0.78                                    | $-3.0 \times 10^{-2}$                            | $9.2 \times 10^{-2}$ | $7.7 \times 10^{-2}$                   |
| Spring nitrate | $3.5 \times 10^{-2}$                          | 0.11                 | $8.6 \times 10^{-2}$                    | $2.8 \times 10^{-2}$                         | 0.024                | 0.77                                    | $6.4 \times 10^{-4}$                             | $5.4 \times 10^{-5}$ | 0.97                                   |
| MHW days       | $-5.5 \times 10^{-3}$                         | $4.2 \times 10^{-3}$ | 0.74                                    | <b>-0.64</b>                                 | <b>0.66</b>          | <b><math>5.03 \times 10^{-2}</math></b> | $2.7 \times 10^{-2}$                             | $7.4 \times 10^{-2}$ | 0.11                                   |
| Purple urchin  | <b><math>9.8 \times 10^{-3}</math></b>        | <b>0.46</b>          | <b><math>3.03 \times 10^{-2}</math></b> | <b>0.56</b>                                  | <b>0.88</b>          | <b><math>1.8 \times 10^{-2}</math></b>  | <b>0.25</b>                                      | <b>0.64</b>          | <b><math>3.1 \times 10^{-4}</math></b> |
| Sunflower star | <b>*-0.21</b>                                 | <b>*0.84</b>         | <b>*<math>1.3 \times 10^{-6}</math></b> | $-2.1 \times 10^{-2}$                        | 0.72                 | $6.8 \times 10^{-2}$                    | <b>-0.21</b>                                     | <b>0.84</b>          | <b><math>1.3 \times 10^{-6}</math></b> |

47

48

49 Supplementary Table 3 – Index data sources for all environmental (largescale and local-scale)  
 50 and biological indices. Detailed descriptions of large and local-scale forcings and their influences  
 51 on kelp dynamics are listed below the table.  
 52

| Response Variable                                                                                                        | Predictor Variables                                                                                                                                                                                                                                                                                                            |                                                                                                                                                                                                                                                                                                                                                                                                                                                                          |                                                                                                                                                                                              |
|--------------------------------------------------------------------------------------------------------------------------|--------------------------------------------------------------------------------------------------------------------------------------------------------------------------------------------------------------------------------------------------------------------------------------------------------------------------------|--------------------------------------------------------------------------------------------------------------------------------------------------------------------------------------------------------------------------------------------------------------------------------------------------------------------------------------------------------------------------------------------------------------------------------------------------------------------------|----------------------------------------------------------------------------------------------------------------------------------------------------------------------------------------------|
|                                                                                                                          | 1985 – 2019                                                                                                                                                                                                                                                                                                                    |                                                                                                                                                                                                                                                                                                                                                                                                                                                                          | 2003 - 2018                                                                                                                                                                                  |
| Kelp Index                                                                                                               | Largescale Indices                                                                                                                                                                                                                                                                                                             | Local-scale Indices                                                                                                                                                                                                                                                                                                                                                                                                                                                      | Biological Indices                                                                                                                                                                           |
| <b>USGS Landsat derived canopy area</b> -<br><a href="https://earthexplorer.usgs.gov">https://earthexplorer.usgs.gov</a> | <b>NPGO</b> -<br><a href="http://www.o3d.org/npgo/">http://www.o3d.org/npgo/</a><br><br><b>PDO</b> -<br><a href="http://research.jisao.washington.edu/pdo/">http://research.jisao.washington.edu/pdo/</a><br><br><b>MEI</b> -<br><a href="https://www.esrl.noaa.gov/psd/enso/mei/">https://www.esrl.noaa.gov/psd/enso/mei/</a> | <b>SST</b> -<br><a href="https://www.ncei.noaa.gov/erddap/griddap/ncdc_oisst_v2_avhrr_by_time_zlev_lat_lon.html">https://www.ncei.noaa.gov/erddap/griddap/ncdc_oisst_v2_avhrr_by_time_zlev_lat_lon.html</a><br><br><b>MHW Days</b> - Hobday et al. 2016 <sup>2</sup><br><br><b>[NO<sub>3</sub>]</b> - Garcia-Reyes et al. 2014 <sup>3</sup><br><br><b>H<sub>s</sub></b> -<br><a href="https://www.ndbc.noaa.gov/station46013">https://www.ndbc.noaa.gov/station46013</a> | <b>Purple urchin and Sunflower star densities</b> -<br><a href="http://data.reefcheck.us/">http://data.reefcheck.us/</a> <sup>1</sup> and California Department of Fish and Wildlife (L.R.B) |

53  
 54  
 55 SST Index –SST conditions effect the distribution (physiological temperature threshold), gametophyte maturation<sup>4</sup>,  
 56 and the seasonal growth rates<sup>5</sup>.  
 57  
 58 NO<sub>3</sub> Index – Nitrate conditions fuel growth seasonally. Growth rates are primarily high in the spring and early  
 59 summer due to the availability of nutrient rich water brought to the surface by seasonal upwelling. Growth rates are  
 60 generally low in the summer due to limited nitrate conditions<sup>5,6</sup>.  
 61  
 62 H<sub>s</sub> Index – Bull kelp are an annual algal species and in exposed regions, such as the northern California coast, are  
 63 typically removed by strong wave forces during fall and winter storms. Therefore, seasonal and annual trends in  
 64 significant wave height influence canopy distribution<sup>6</sup>.  
 65  
 66 MEI Index – the Multivariate El Niño/Southern Oscillation (ENSO) Index (MEI.v2) is indicative of global climate  
 67 disruptions and derived from five different variables (sea level pressure, sea surface temperature, zonal and  
 68 meridional components of the surface wind, and outgoing longwave radiation). Disruptions to oceanographic  
 69 conditions via ENSO patterns influence SST, NO<sub>3</sub>, and wave height conditions (H<sub>s</sub>). Studies have found ENSO to be  
 70 an important driver of kelp dynamics across the globe<sup>7-11</sup>.  
 71  
 72 NPGO Index – the North Pacific Gyre Oscillation is an oceanic climate index derived from the second mode of sea  
 73 surface height variability in the northeast Pacific and influences sea surface nutrient dynamics in the North Pacific  
 74 Gyre and California Current. Many studies in the NE Pacific have found NPGO to be an important driver of regional  
 75 kelp dynamics<sup>10,12,13</sup>.  
 76  
 77 PDO Index – the Pacific Decadal Oscillation index is derived from the first mode of sea surface temperature  
 78 variability in the north Pacific poleward of 20°N. Many studies in the NE Pacific have found PDO to be an  
 79 important driver of regional kelp dynamics<sup>10,12,13</sup>.

80 Supplementary Figure 3 – Box and whisker plot for all predictor (environmental and biological)  
 81 and response (kelp canopy) variables. Variable-wise outliers are defined as datapoints outside 1.5  
 82 times the interquartile range (1.5\*IQR; black points). Total sample number across the entire  
 83 variable timeseries is represented by  $n_t$ . Sampling frequency (annual, monthly, daily, or hourly)  
 84 is depicted by the grey boxes near the x-axis.

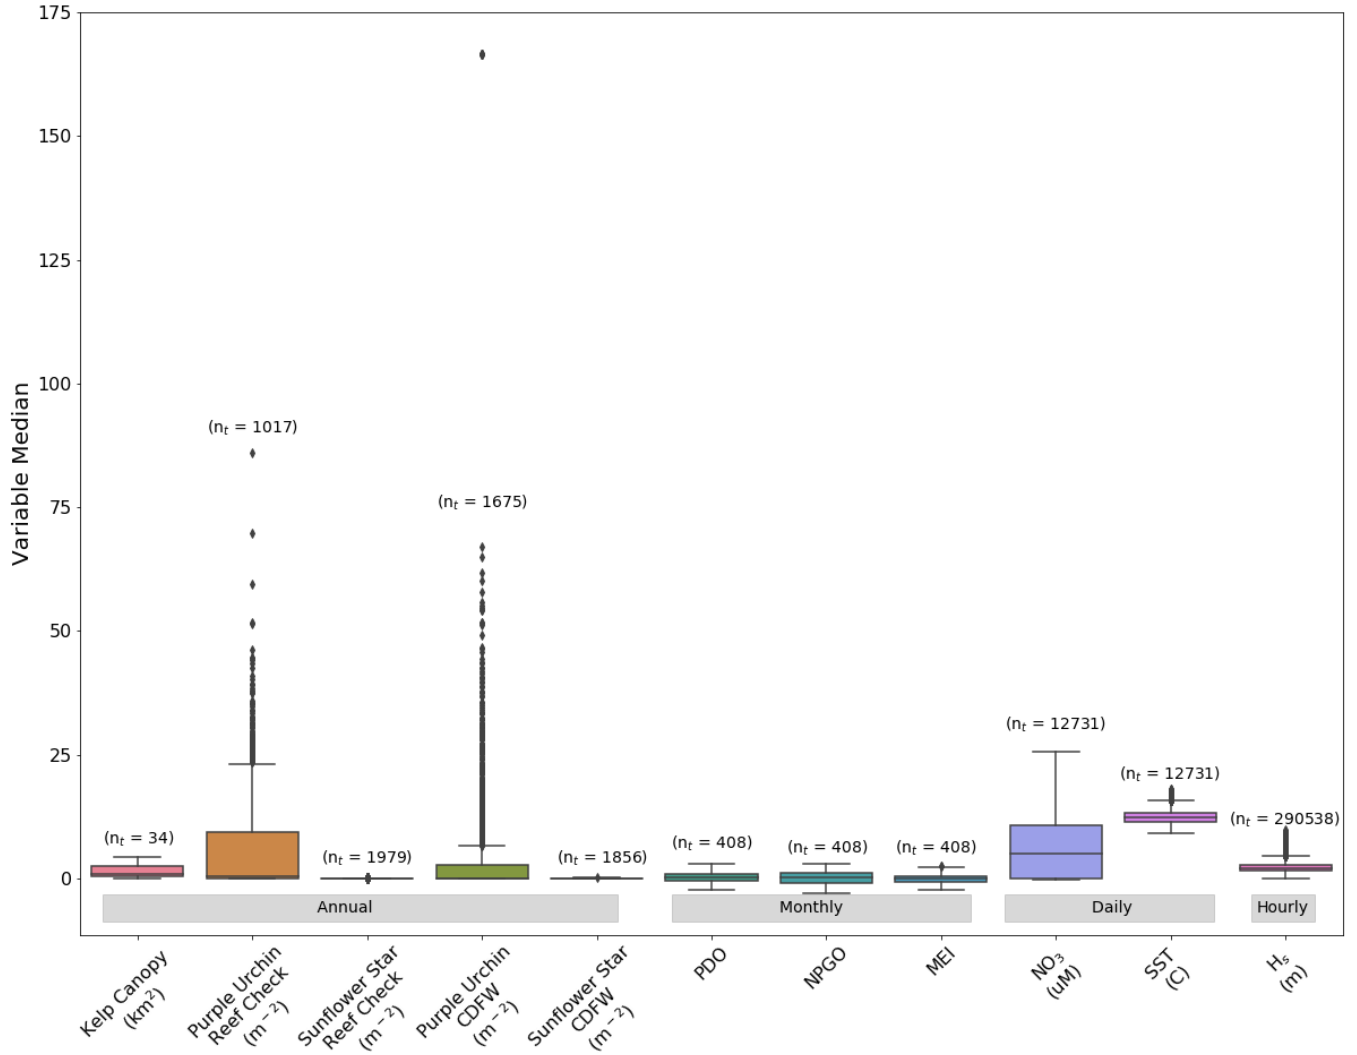

85  
86

87 Supplementary Figure 4 – Temporal (a) and spatial (b and c) representation of sub-tidal sampling  
 88 efforts in Sonoma and Mendocino Counties in the northern California, USA region between  
 89 2003 and 2018 by California Department of Fish and Wildlife (CDFW) and Reef Check  
 90 California.

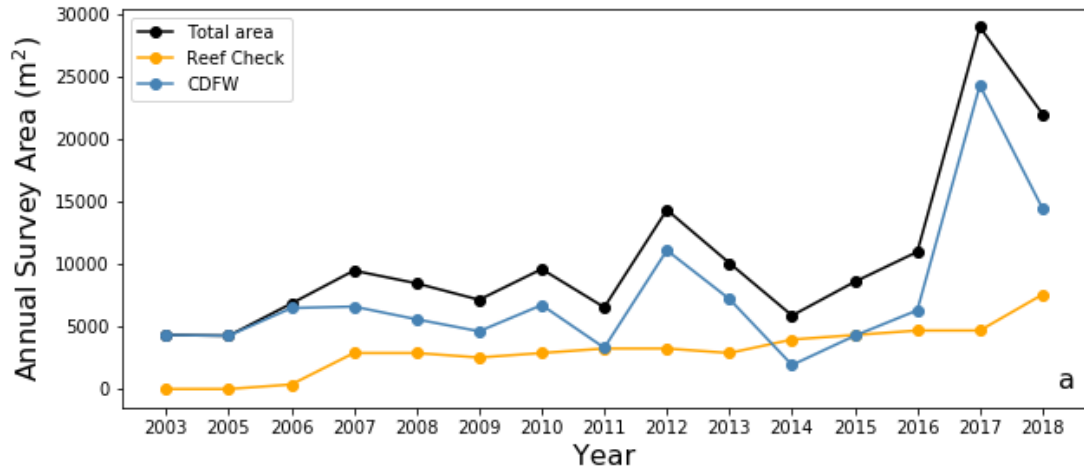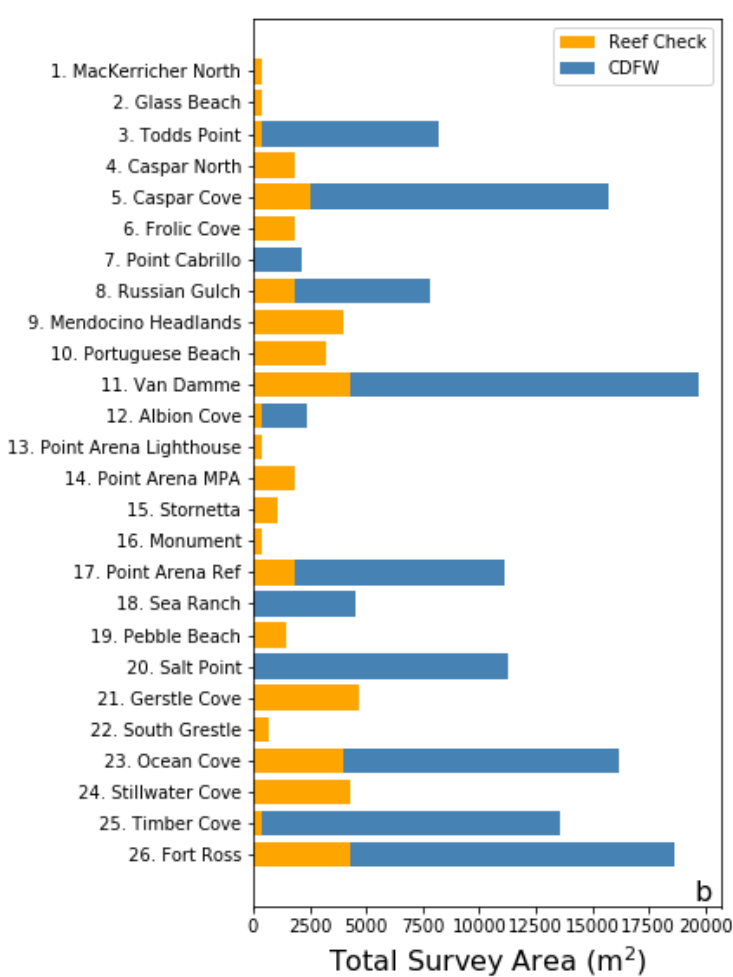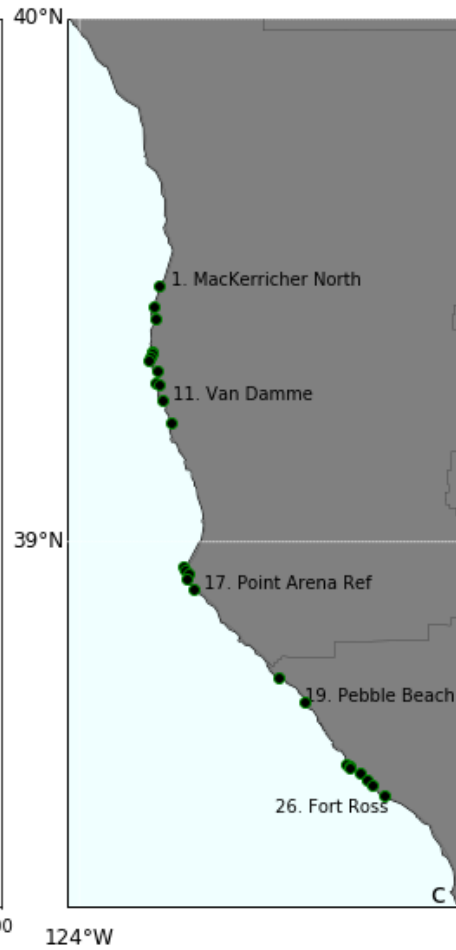

91

92 Supplementary Figure 5 – Correlation matrix of all environmental and biological variables used  
 93 in the partial least squares – regression (PLSR) analysis. The upper panel corner shows the scatter  
 94 plots Pearson correlation coefficients (r) for each pair-wise relationship. The lower corner shows  
 95 the kernel density distribution for each pair-wise relationship. The diagonal shows the data  
 96 distribution for each variable. Strong co-linearity exists between seasonal sea surface  
 97 temperature (SST) and nitrate (NO<sub>3</sub>) conditions.  
 98

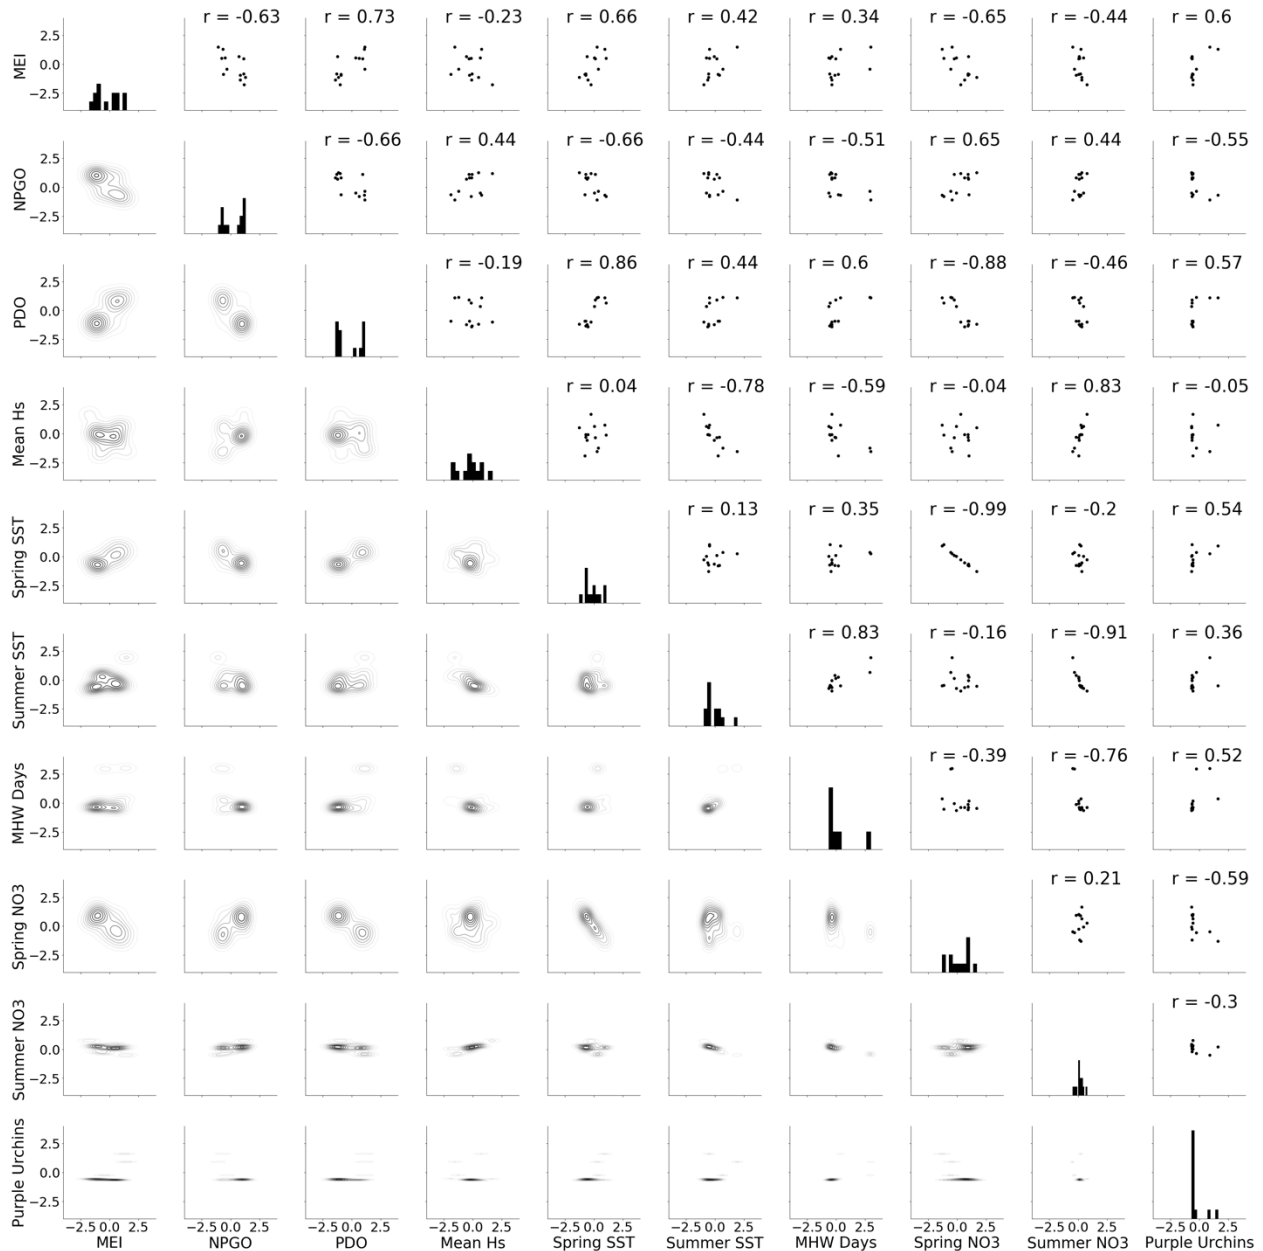

99  
 100  
 101



102 Supplementary Figure 6 – Partial least squares regression (PLSR) component- and variable-wise  
 103 cross-validation results presented as the mean squared error (MSE) for (a) environmental indices  
 104 (1985 – 2016) and (b) environmental and purple urchins (all indices; 2003 – 2016).  
 105

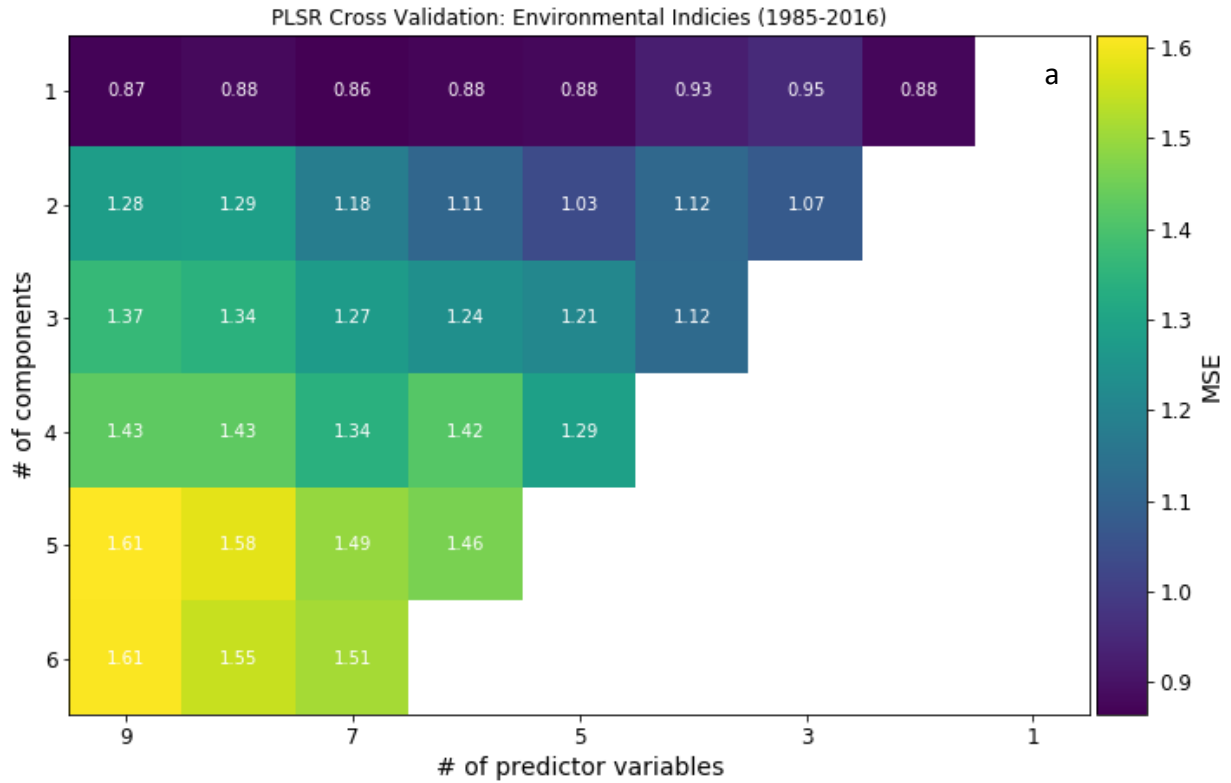

106  
107

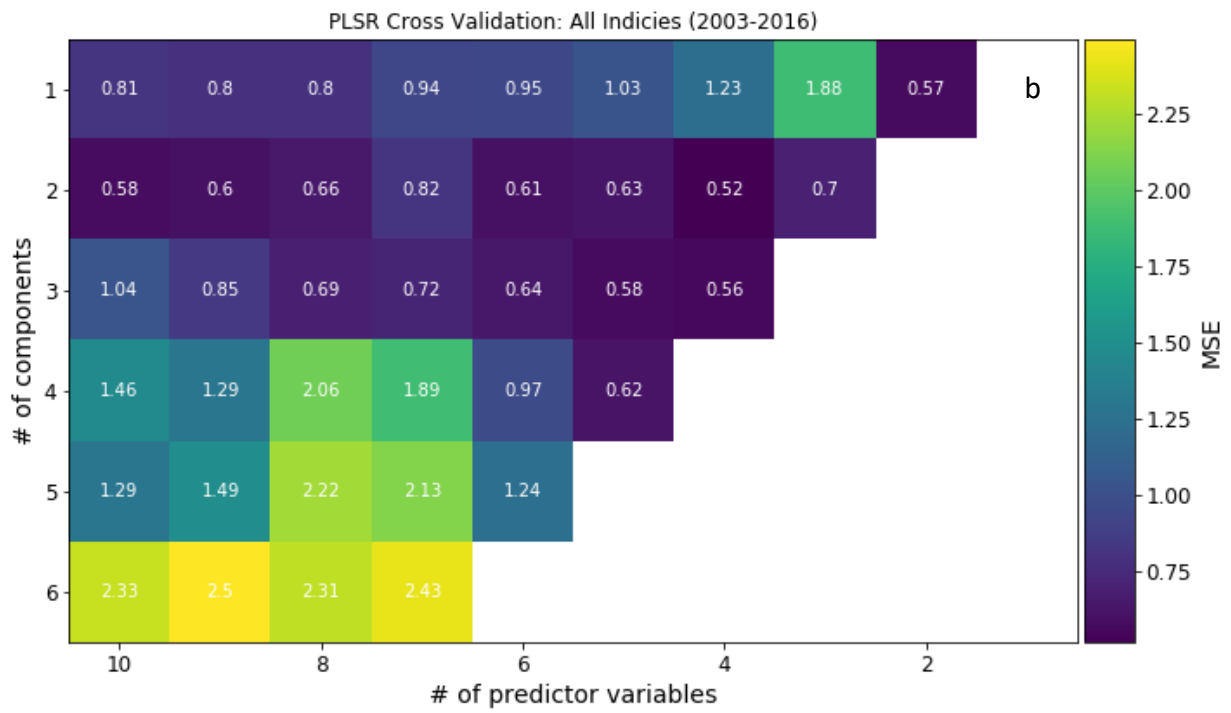

108

109 **Supplementary References**

110

111 1. McHugh, T., Abbott, D. & Freiwald, J. Phase shift from kelp forest to urchin barren along  
112 California's North Coast. in *Western Society of Naturalists* (2018).

113 2. Hobday, A. J. *et al.* A hierarchical approach to defining marine heatwaves. *Prog.*  
114 *Oceanogr.* **141**, 227–238 (2016).

115 3. García-reyes, M., Largier, J. L. & Sydeman, W. J. Progress in Oceanography Synoptic-  
116 scale upwelling indices and predictions of phyto- and zooplankton populations. *Prog.*  
117 *Oceanogr.* **120**, 177–188 (2014).

118 4. Vadas, R. L. Ecological implications of culture studies on *nereocystis luetkeana*. *J.*  
119 *Phycol.* **8**, 196–203 (1972).

120 5. Wheeler, W. N., Smith, R. G. & Srivastava, L. M. Seasonal Photosynthetic Performance  
121 of *Nereocystis-Luetkeana*. *Can. J. Bot. Can. Bot.* **62**, 664–670 (1984).

122 6. Springer, Y., Hays, C., Carr, M., Mackey, M. & Bloeser, J. Ecology and management of  
123 the bull kelp, *Nereocystis luetkeana*: A synthesis with recommendations for future  
124 research. 48 (2006).

125 7. Tegner, M. J. M. & Dayton, P. K. P. El Nino effects on southern California kelp forest  
126 communities. *Adv. Ecol. Res.* **17**, 243–279 (1987).

127 8. Friedlander, A. M. *et al.* Kelp forests at the end of the earth : 45 years later. *PLoS One* **15**,  
128 1–23 (2020).

129 9. Tally, L. ., Pickard, G. L., Emery, W. J. & Swift, J. H. *Descriptive Physical*  
130 *Oceanography: An Introduction*. (Elsevier Ltd., 2011).

131 10. Cavanaugh, K. C., Siegel, D. A., Reed, D. C. & Dennison, P. E. Environmental controls of  
132 giant-kelp biomass in the Santa Barbara Channel, California. *Mar. Ecol. Prog. Ser.* **429**,  
133 1–17 (2011).

134 11. Schiel, D. R. & Foster, M. S. *The Biology and Ecology of Giant Kelp Forests*. (2015).

135 12. Hamilton, S. L., Caselle, J. E. & Hamilton, S. L. Exploitation and recovery of a sea urchin  
136 predator has implications for the resilience of southern California kelp forests. *Proc. R.*  
137 *Soc. B* **282**, (2014).

138 13. Pfister, C. A., Berry, H. D. & Mumford, T. The dynamics of Kelp Forests in the Northeast  
139 Pacific Ocean and the relationship with environmental drivers. *J. Ecol.* 1–14 (2017).

140 doi:10.1111/1365-2745.12908

141
