# Supplementary material for: Large-scale shift in the structure of a kelp forest ecosystem co-occurs with an epizootic and marine heatwave
Source: PubMed Central journal article supplement (PMC7935997; doi:10.1038/s42003-021-01827-6), 2021-03-05
Supplement: 42003_2021_1827_MOESM3_ESM.pdf [file 42003_2021_1827_MOESM3_ESM.pdf]

## **Description of Additional Supplementary Files**

**File name:** Supplementary Data

**File Description:** Source data for Figures 1-4
